# Supplementary material for: Ubiquitination site preferences in anaphase promoting complex/cyclosome (APC/C) substrates
Source: PubMed Central journal article supplement (PMC3787748; doi:10.1098/rsob.130097), 2013-09

## Supplementary figure legends

### Figure S1

Statistics of ubiquitination sites in the non-redundant compendium compiled in electronic supplementary material, table S1. **(a-b)** Breakdown of ubiquitinated proteins by the number of modified sites per protein **(a)** compared to that of phosphorylation sites **(b)** from the human proteome. **(c)** Breakdown of ubiquitination sites by the number of studies that identified them. 37% of sites fall in categories 2-8 (plotted here on log scale).

### Figure S2

**(a)** Multiple testing correction of flanking region preferences. To apply the most rigorous test possible to the statistical significance of the identified amino acid enrichments in the flanking region of APC/C ubiquitination sites, we applied a multiple testing correction to the calculated  $p$ -values ( $p$  [corrected] =  $1 - (1 - p)^n$ ). This test recalculates confidence measures allowing for random occurrence of the identified enrichment at any particular position within multiple positions [1]. This correction would underestimate the significance of enrichment at individual positions, but even so the  $p$ -value for serine at -1 position remained significant.

**(b)** Ubiquitination sites close to potential degrons show stronger preference for serine at -1 and in 'KEN' motif than general ubiquitination sites in APC/C substrates. Right-hand panel: Flanking region profile of ubiquitination sites within 40 residues downstream of potential degrons ('RxxL' and 'KEN' motifs) in APC/C substrates. Heat map ( $\ln$  of the  $p$ -value) depicts significance of enrichment (in red) or depletion (in blue) for each amino acid as described in figure 2a-b. Left-hand panel is adopted from figure 2a for comparison.

### Figure S3

Identification of ubiquitination sites in Aurora A by mass spectrometry.

**(a)** Sequence coverage achieved is shaded yellow, with the A-box in red. The number of ubiquitinated peptides identified was very low **(b)**, reflecting our general observation that <1% of total substrate is

polyubiquitinated at any one time. We used Aurora AAA-box rather than the full-length protein, because we can achieve much higher levels of expression of this version, since this protein is still ubiquitinated in APC/C-dependent manner, but not efficiently degraded (MM, S. Qiao, CL, unpublished data).

#### Figure S4

Further investigation of the Aurora A KEN motif. *(a)* U2OS cells expressing indicated AurA-Venus constructs were imaged in mitosis in preparation for time-lapse degradation assays. AurA-Venus KEN>KAA did not localise correctly at mitosis, even though AurA-Venus KEN>AAA localised exactly like the wild-type protein. Bars, 10  $\mu$ m. *(b)* *In vivo* degradation assays (performed as described in figure 4d) for different AurA-Venus KEN mutants showed that AurA-Venus KEN>KAA is completely stable during mitotic exit and that AurA-Venus KEN>AAA is partially degraded, although more slowly than the wild-type protein or AurA-Venus KEN>REN. We concluded that Aurora A KEN probably contributes to both degron and ubiquitin acceptor functions in Aurora A degradation but that we could not test this idea further using Aurora A KEN>KAA since this version of Aurora A (mislocalized, likely misfolded) was not suitable for further study.

#### Figure S5.

*In vivo* degradation assay for Nek2A WT and SKEN mutants. Time-lapse imaging and quantifications were performed as in figure 4d. NEBD, Nuclear Envelope Breakdown.

1. Noble WS (2009) How does multiple testing correction work? *Nature Biotechnology* **27**: 1135-1137

# Supplementary figure S1

(a)

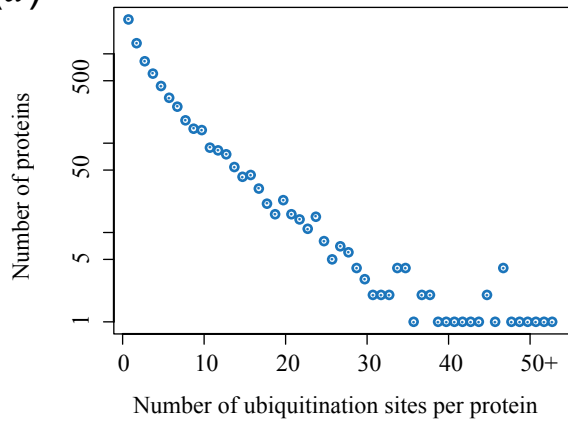

(b)

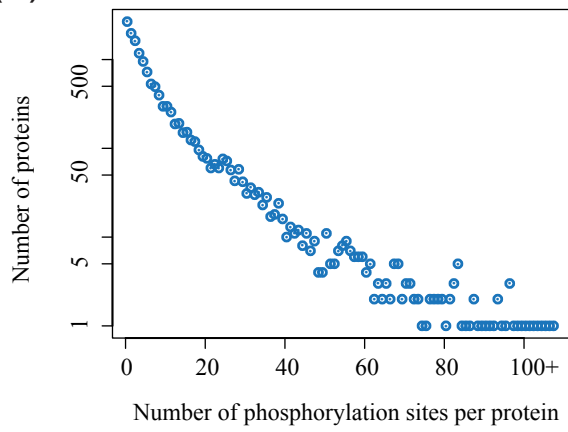

(c)

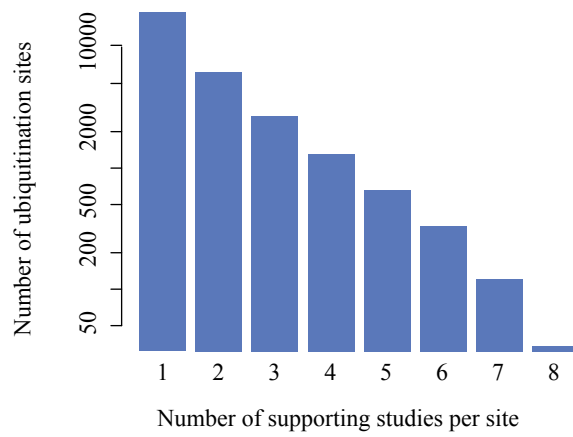

# Supplementary figure S2

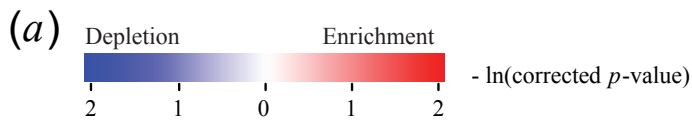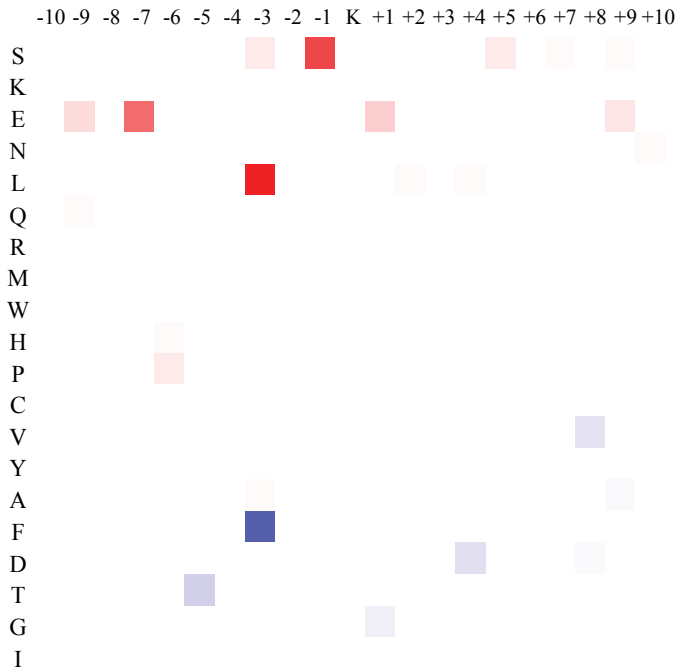

ub-sites in APC/C substrates vs all ub-sites

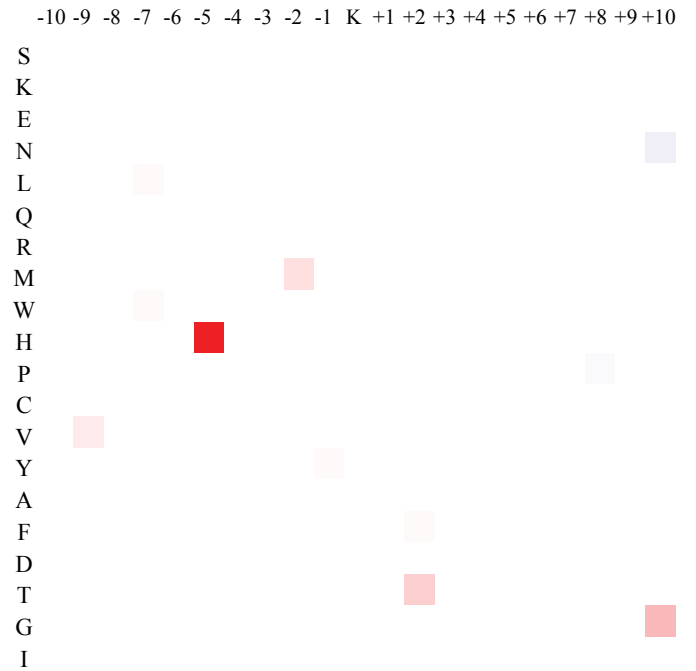

ub-sites in SCF substrates vs all ub-sites

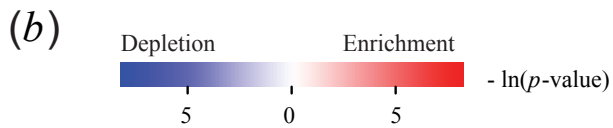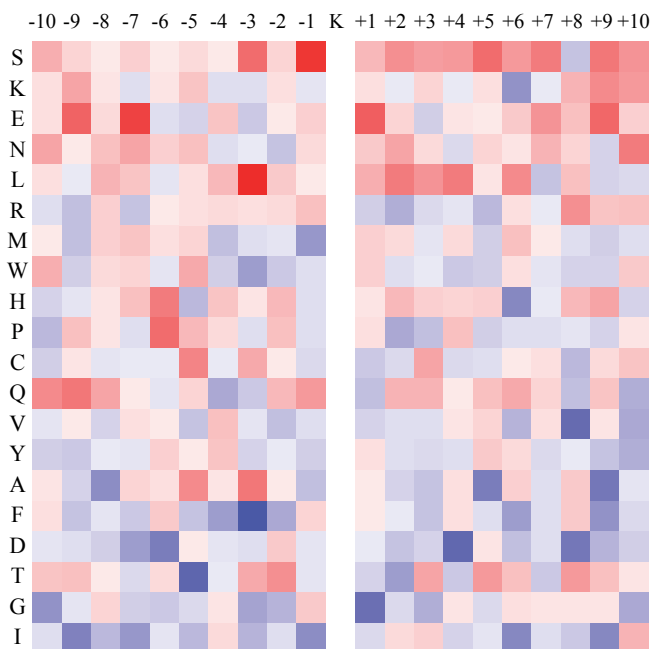

ub-sites in APC/C substrates vs all ub-sites

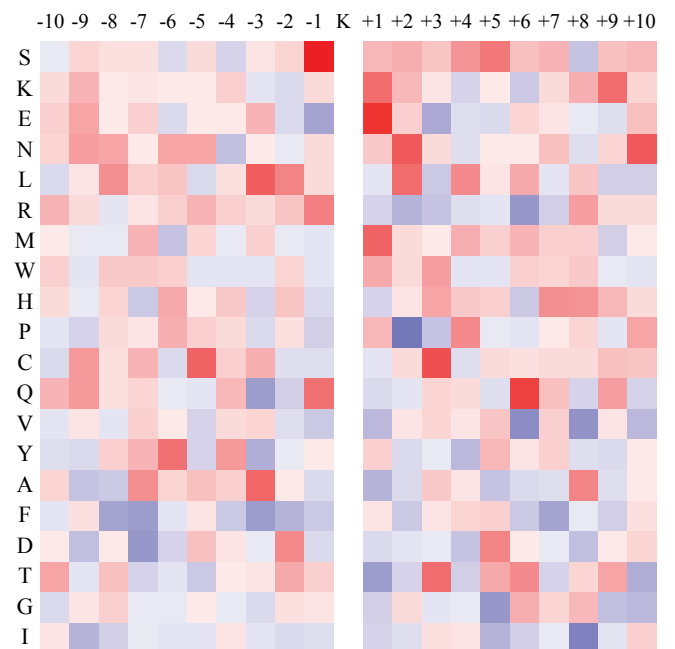

ub-sites in APC/C substrates  $\leq 40$  residues downstream of D-box or KEN motif vs all ub-sites

## Supplementary figure S3

(a)

```

10      20      30      40      50      60      70      80      90
MDRSKENCISGPVKATAPVGGPKRVLVTQQFPCQNLPVNSGQAQRVLCPSNSSQRVPLQAQKLVSSHKPVQNQKQKQLQATSVPHVSR
100     110     120     130     140     150     160     170     180
PLNNTQKSKQPLPSAPENNPEEELASKQKNEESKKRQWALEDFEIGRPLGKGKFGNVYLAREKQSKFILALKVLFKAQLEKAGVEHQLRR
190     200     210     220     230     240     250     260     270
EVEIQSHLRHPNILRLYGYFHDATRYYLILEYAPLGTVYRELQKLSKFDEQRTATYITELANALSYCHSKRVIHRDIKPENLLGSAGEL
280     290     300     310     320     330     340     350     360
KIADFGWSVHAPSSRRTTLCGTLDYLPPEMIEGRMHDEKVDLWSLGVLCYEFVLGKPPFEANTYQETYKRISRVEFTFPDFVTEGARDLI
370     380     390     400
SRLLKHNPQRMLREVLEHPWITANSSKPSNCKNESASKQS
  
```

72% coverage of whole Aurora A sequence

82% coverage of Aurora A sequence excluding the unidentifiable peptides in deleted A-box

(b)

| Ubiquitination sites | Unmodified peptide no. | Ubiquitinated peptide no. |
|----------------------|------------------------|---------------------------|
| K5                   | 14                     | 3                         |
| K14                  | 17                     | 1                         |
| K97/99               | 14                     | 1                         |
| K389/396             | 7                      | 1                         |

## Supplementary figure S4

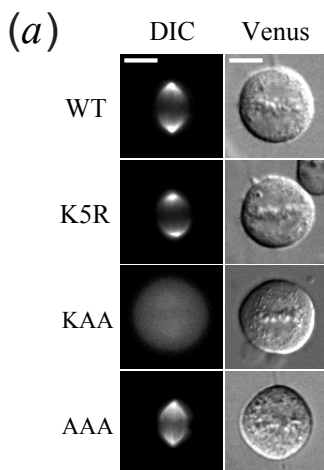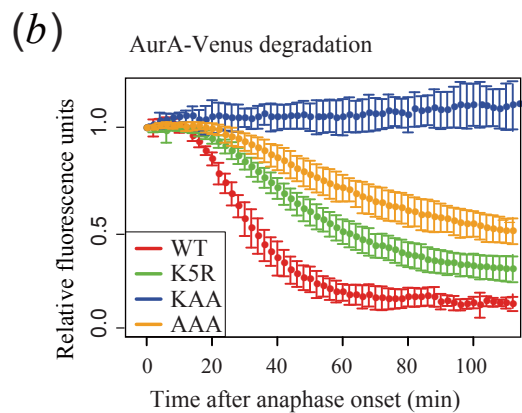

# Supplementary figure S5

## Venus-Nek2A degradation

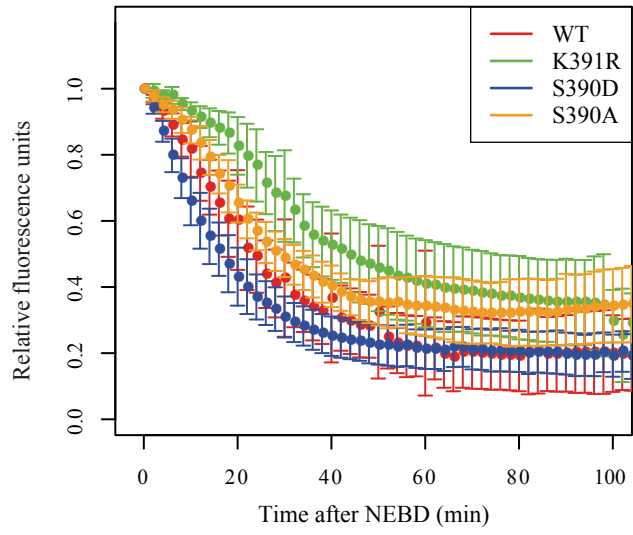

## Degradation rates

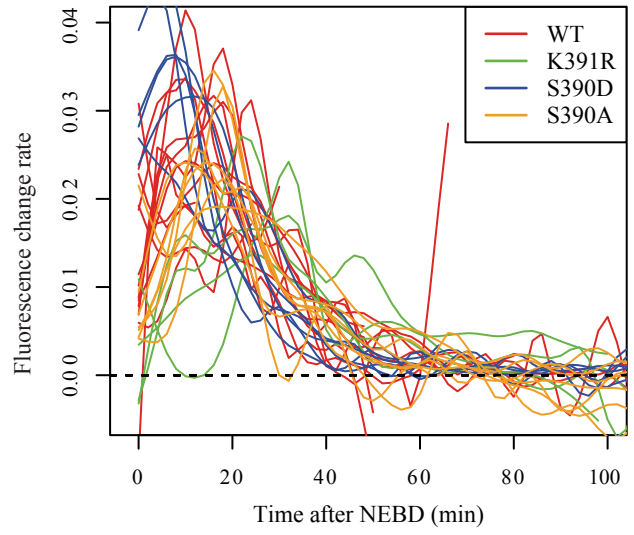

Supplement: rsob130097supp1.pdf [file rsob130097supp1.pdf]
